# Supplementary material
Source: publisher site journal article supplement (https://www.dovepress.com/article/521112)
Supplement: Supplementary file 1 [file Supplementary+Table_1_1+CLEAN.docx]

| Characteristics | Values |
| --- | --- |
| Age (years) | 69.48 ± 8.64 |
| Male, n (%) | 487 (84.11%) |
| Smoking status, n (%) |  |
| Never-smoker | 113 (19.62%) |
| Ex-smoker | 351 (60.94%) |
| Current-smoker | 112 (19.44%) |
| BMI (kg/m2) | 22.15 ± 3.64 |
| Hypertension, n (%) | 219 (37.82%) |
| Diabetes, n (%) | 39 (6.74%) |
| Coronary Heart Disease, n (%) | 74 (12.78%) |
| Chronic Kidney Disease, n (%) | 41 (7.08%) |
| PH | 7.44 ± 0.04 |
| Paco2 (mmHg) | 43.37 ± 8.66 |
| Oxygenation index | 340.12 ± 82.16 |
| WBC (109/L) | 6.75 (5.24-8.68) |
| Neutrophil (109/L) | 4.63 (3.44-6.49) |
| Lymphocyte (109/L) | 1.18 (0.84-1.56) |
| Eosinophil (109/L) | 0.10 (0.04-0.18) |
| Platelet (109/L) | 193.00 (156.00-240.75) |
| Hb (g/L) | 133.86 ± 17.11 |
| RBC (109/L) | 4.33 ± 0.56 |
| CRP (mg/L) | 6.20 (1.89-24.48) |
| Fibrinogen (ng/mL) | 4.07 ± 1.17 |
| D-Dimer (ng/mL) | 133.50 (79.75-227.25) |
| albumin (g/L) | 40.48 ± 4.97 |
| Uric Acid (umol/L) | 342.15 (282.15-417.75) |
| Creatinine（μmol/L） | 75.40 (65.40-89.10) |
| ProBNP (pg/mL) | 144.50 (63.00-370.50) |
| Inhaled Medication |  |
| LAMA | 44 (7.84%) |
| ICS+LABA | 105 (18.72%) |
| LABA+LAMA | 97 (17.29%) |
| ICS+LABA+LAMA | 315 (56.15%) |
| LOHS | 8.00 (7.00-10.00) |
| FEV1 (L/min) | 1.01 (0.75-1.41) |
| FEV1 % predicted | 44.00 (33.00-60.00) |
| FVC (L/min) | 2.26 (1.83-2.85) |
| FVC % predicted | 74.00 (61.00-89.00) |
| FEV1/FVC (%) | 47.79 (38.11-57.09) |

**Supplementary Table 1.** Baseline characteristics of the study population.

**Note:** Data are expressed as the mean±SD, median (interquartile range), or percentage.

**Supplementary Table 2.** Association between the BMI and lung function after stratification by hemoglobin levels.

|  | β (95% CI) | | | |
| --- | --- | --- | --- | --- |
| Model | Hblow | Hbmiddle | Hbhigh | P interaction |
| Model 1 | 0.02 (-0.00, 0.04) | 0.02 (0.00, 0.04) | 0.07 (0.05, 0.08) | **0.00** |
| Model 2 | 0.03 (0.00, 0.05) | 0.03 (0.01, 0.05) | 0.07 (0.05, 0.08) | **0.00** |
| Model 3 | 0.02 (-0.01, 0.04) | 0.00 (-0.02, 0.02) | 0.05 (0.03, 0.06) | **0.00** |

**Note:** Data were presented as β (95% CI). Hblow subgroup (42.0–123.0 g/L): Hemoglobin levels in the lowest third; Hbmiddle subgroup (124.0–138.0 g/L): Hemoglobin levels in the middle third; Hbhigh subgroup (139.0–174.0 g/L): Hemoglobin levels in the highest third. Model 1: No covariates were adjusted. Model 2: age, sex, smoking status were adjusted. Model 3: age, sex, smoking status, hypertension, diabetes, Paco2, lymphocyte, eosinophil, CRP, fibrinogen, D-Dimer, albumin, inhalation therapy regimens at admission were adjusted. 0.00 indicates a p-value less than 0.001. Bold values indicate statistical significance at p-value less than 0.05.

**Supplementary Table 3.** Baseline characteristics of the study population based on one of the five imputed datasets after multiple imputation.

**Note:** Data are expressed as the mean±SD, median (interquartile range), or percentage. The Kruskal–Wallis test and chi-square test were used to compare patient characteristics across BMI quartiles. 0.00 indicates a p-value less than 0.001. Bold values indicate statistical significance at p-value less than 0.05.

| BMI (kg/m2) p | | | | | |
| --- | --- | --- | --- | --- | --- |
|  | Q1(13.2-18.9)  N=142 | Q2 (18.9-21.5)  N=147 | Q3 (21.5-24.2)  N=145 | Q4 (24.2-34.0)  N=145 |  |
|  |
| Age (years) | 70.11 ± 8.03 | 68.32 ± 8.64 | 70.20 ± 8.03 | 69.49 ± 9.54 | 0.21 |
| Ex-smoker, n (%) | 93 (65.49%) | 94 (63.95%) | 83 (57.24%) | 83 (57.24%) | 0.24 |
| Paco2 (mmHg) | 45.09 ± 8.51 | 44.64 ± 9.33 | 42.23 ± 9.14 | 41.38 ± 6.88 | **0.00** |
| Lymphocyte (109/L) | 1.00 (0.70-1.42) | 1.15 (0.84-1.42) | 1.17 (0.82-1.52) | 1.42 (1.01-1.83) | **0.00** |
| Eosinophil (109/L) | 0.09 (0.04-0.16) | 0.09 (0.04-0.16) | 0.10 (0.03-0.20) | 0.13 (0.06-0.21) | 0.06 |
| CRP (mg/L) | 7.50 (1.64-29.47) | 7.40 (1.79-31.94) | 4.97 (1.50-23.29) | 5.73 (2.00-23.00) | 0.19 |
| Fibrinogen (ng/mL) | 4.18 ± 1.12 | 4.08 ± 1.18 | 3.94 ± 1.27 | 4.06 ± 1.10 | 0.19 |
| D-Dimer (ng/mL) | 154.00 (81.00-263.75) | 134.00 (78.00-246.00) | 135.00 (75.00-208.00) | 125.00 (84.00-221.00) | 0.51 |
| albumin (g/L) | 39.03 ± 4.71 | 40.34 ± 5.19 | 41.02 ± 4.89 | 41.58 ± 4.85 | **0.00** |
| ICS + LABA + LAMA, n (%) | 95 (66.90%) | 92 (62.59%) | 68 (46.90%) | 71 (48.97%) | **0.02** |

**Supplementary Table 4.** Association of the BMI with lung function parameters and LOHS.

|  | Model | |
| --- | --- | --- |
|  | β (95% CI) | p |
| FEV1 | 0.03 (0.01 to 0.04) | **0.00** |
| FEV1 % predicted | 0.82 (0.40 to 1.23) | **0.00** |
| FVC | 0.02 (0.01 to 0.04) | **0.00** |
| FVC % predicted | 0.59 (0.11 to 1.08) | **0.02** |
| FEV1/FVC | 0.57 (0.32 to 0.81) | **0.00** |
| LOHS | 0.01 (-0.08 to 0.10) | 0.84 |
| Hblow-middle |  |  |
| FEV1 | 0.01 (-0.01 to 0.03) | 0.05 |
| FEV1 % predicted | 0.50 (-0.04 to 1.04) | 0.07 |
| FVC | 0.01 (-0.01 to 0.03) | 0.55 |
| FVC % predicted | 0.31 (-0.33 to 0.95) | 0.35 |
| FEV1/FVC | 0.44 (0.14 to 0.74) | **0.00** |
| Hbhigh |  |  |
| FEV1 | 0.05 (0.03 to 0.07) | **0.00** |
| FEV1 % predicted | 1.51 (0.85 to 2.16) | **0.00** |
| FVC | 0.06 (0.03 to 0.08) | **0.00** |
| FVC % predicted | 1.14 (0.37 to 1.91) | **0.00** |
| FEV1/FVC | 0.91 (0.47 to 1.35) | **0.00** |

**Note:** Data were presented as β (95% CI) P value. age, sex, smoking status, hypertension, diabetes, Paco2, lymphocyte, eosinophil, CRP, fibrinogen, D-Dimer, albumin, inhalation therapy regimens at admission were adjusted. Hblow-middle (42.0–138.0 g/L): Combined group of the first two terciles of hemoglobin levels. Hbhigh: (139.0–174.0 g/L) The third tercile of hemoglobin levels. 0.00 indicates a p-value less than 0.001. Bold values indicate statistical significance at p-value less than 0.05.
